# Supplementary material
Source: publisher figshare collection journal article supplement (https://karger.figshare.com/ndownloader/files/20325729)
Supplement: Supplementary file 1 [file 20325729]

Supplementary Appendix:

Members of the Genomics Research and Innovation Network (GRIN)

Kenneth D. Mandl,1,2,3* Tracy Glauser,4,5* Ian D Krantz,6,7* Paul Avillach,1,2 Anna Bartels,8 Alan H Beggs,3,9,10 Sawona Biswas,6 Florence T Bourgeois,1,3,10 Jeremy Corsmo,5,11 Andrew Dauber,5,12 Batsal Devkota,13 Gary R Fleisher,3,10  Allison P Heath,13 Ingo Helbig,7,14 Joel N Hirschhorn,3,15 Judson Kilbourn,1 Sek Won Kong,1,3 Susan Kornetsky,16 Joseph A Majzoub,3,10,15Keith Marsolo,17,18 Lisa J Martin,5,19 Jeremy Nix,17 Amy Schwarzhoff,20 Jason Stedman,2 Arnold Strauss,5,21 Kristen L Sund,19 Deanne M Taylor,7,13 Peter S White,5,17,18, Darlene Barkman,20 Erin M. Borglund,1 Ramkrishna Chakrabarty,22 Alka Chandel,17 Anil Kumar Degala,1,2 Thomas DeSain,2 Philip Dexheimer,17Parth Divekar,17 Alyssa Ellis,1Mike Furgason,17 Christopher Geehan,23 Andrew Joseph Guidetti,2  Alba Gutierrez,2 Barbara Hallinan,4,5 Becca Harper,24 Niloofar Jalali,2 Jaspreet Khanna,1,2Christopher Kirby,23 Gabor Korodi,2 Michal Kouril,17 Amy Kratchman,20 Ranjay Kumar,2 Guillaume Labilloy,17 In-Hee Lee,1 Bria Morgan,2 James Morgan,17 Louis J Muglia,5,19 Aleksandr Nikitin,1,2 Mike Pistone,25 Anna Poduri,26 Andrew Rupert,17 Kristen Safier,27 Piotr Sliz,22 Gelvina Stevenson,20 Joseph St. Geme III,20 Vidhu Thaker,15,28 Simone Temporal,20 Prakash Velayutham,17  Julie Wijesooriya,5 Bryan Wolf,20 Andrew Wooten,25 Alan Yen,29 Yu Zhang2

1. Computational Health Informatics Program, Boston Children’s Hospital, Boston, MA 02115
2. Department of Biomedical Informatics, Harvard Medical School, Boston, MA 02115
3. Department of Pediatrics, Harvard Medical School, Boston, MA 02115
4. Division of Neurology, Cincinnati Children’s Hospital Medical Center, Cincinnati, OH
5. Department of Pediatrics, University of Cincinnati College of Medicine, Cincinnati, OH
6. Division of Genetics at Children's Hospital of Philadelphia, Philadelphia, PA 19104
7. Department of Pediatrics, Perelman School of Medicine at the University of Pennsylvania, Philadelphia, PA
8. Cincinnati Children’s Hospital Medical Center, Cincinnati, OH
9. Division of Genetics & Genomics, Boston Children's Hospital, Boston, MA 02115
10. Department of Pediatrics, Boston Children’s Hospital, Boston, MA 02115
11. Office of Research Compliance and Regulatory Affairs, Cincinnati Children’s Hospital Medical Center, Cincinnati, OH
12. Division of Endocrinology, Children’s National Hospital System, Washington D.C.
13. Department of Biomedical and Health Informatics, The Children's Hospital of Philadelphia, Philadelphia, PA
14. Division of Neurology, Children's Hospital of Philadelphia, Philadelphia, PA 19104
15. Division of Endocrinology, Boston Children’s Hospital, Boston, MA 02115
16. Research Administration, Boston Children's Hospital, Boston, MA 02115
17. Division of Biomedical Informatics, Cincinnati Children’s Hospital Medical Center
18. Department of Biomedical Informatics, University of Cincinnati College of Medicine, Cincinnati, OH
19. Division of Human Genetics, Cincinnati Children’s Hospital Medical Center, Cincinnati, OH
20. Children's Hospital of Philadelphia, Philadelphia, PA 19104
21. Division of Cardiology, Cincinnati Children’s Hospital Medical Center, Cincinnati, OH
22. Research Computing, Boston Children's Hospital, Boston, MA 02115
23. Office of General Counsel, Boston Children's Hospital, Boston, MA 02115
24. Clinical Translational Research Center, Cincinnati Children’s Hospital Medical Center, Cincinnati, OH
25. Innovation Ventures, Cincinnati Children’s Hospital Medical Center, Cincinnati, OH
26. Department of Neurology, Boston Children’s Hospital, Boston, MA 02115
27. Legal Department, Cincinnati Children’s Hospital Medical Center, Cincinnati, OH
28. Department of Pediatrics, Columbia University Medical Center, New York, NY
29. Technology & Innovation Development Office, Boston Children's Hospital, Boston, MA 02115
